# Supplementary material for: Interplay between multiple doping elements in high-voltage LiCoO2
Source: Royal Society of Chemistry journal article supplement (doi:10.1039/d0ta09931g), 2021-01-01
Supplement: d0ta09931g1.pdf [file d0ta09931g1.pdf]

Supporting Information for

**The interplay between multiple doping elements in high-voltage LiCoO<sub>2</sub>**

*Sicheng Song<sup>a</sup>, Yiwei Li<sup>a</sup>, Kai Yang<sup>a</sup>, Zhefeng Chen<sup>a</sup>, Jiajie Liu<sup>a</sup>, Rui Qi<sup>a</sup>, Zhibo Li<sup>a</sup>,  
Changjian Zuo<sup>a</sup>, Wenguang Zhao<sup>a</sup>, Ni Yang<sup>a</sup>, Mingjian Zhang<sup>a,b\*</sup>, Feng Pan<sup>a\*</sup>*

<sup>a</sup> School of Advanced Materials, Peking University, Shenzhen Graduate School, Shenzhen 518055, People's Republic of China.

<sup>b</sup> Center for Advanced Radiation Source (ChemMatCARS), the University of Chicago, Argonne, Illinois 60439, United States.

\*Corresponding author: zhangmj@pkusz.edu.cn (M.Z.); panfeng@pkusz.edu.cn (F.P.);

## 1. Figures

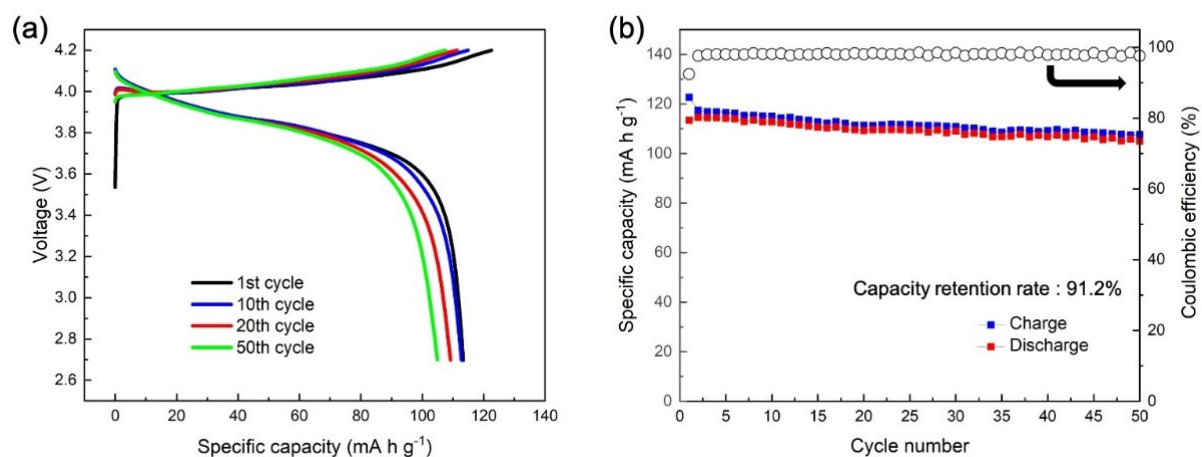

Figure S1. Electrochemical performance of LCO in the voltage range of 2.7-4.2 V using the current density of  $150 \text{ mA g}^{-1}$ . (a) The charge/discharge profiles at selected cycles. (b) The cycling performance of LCO.

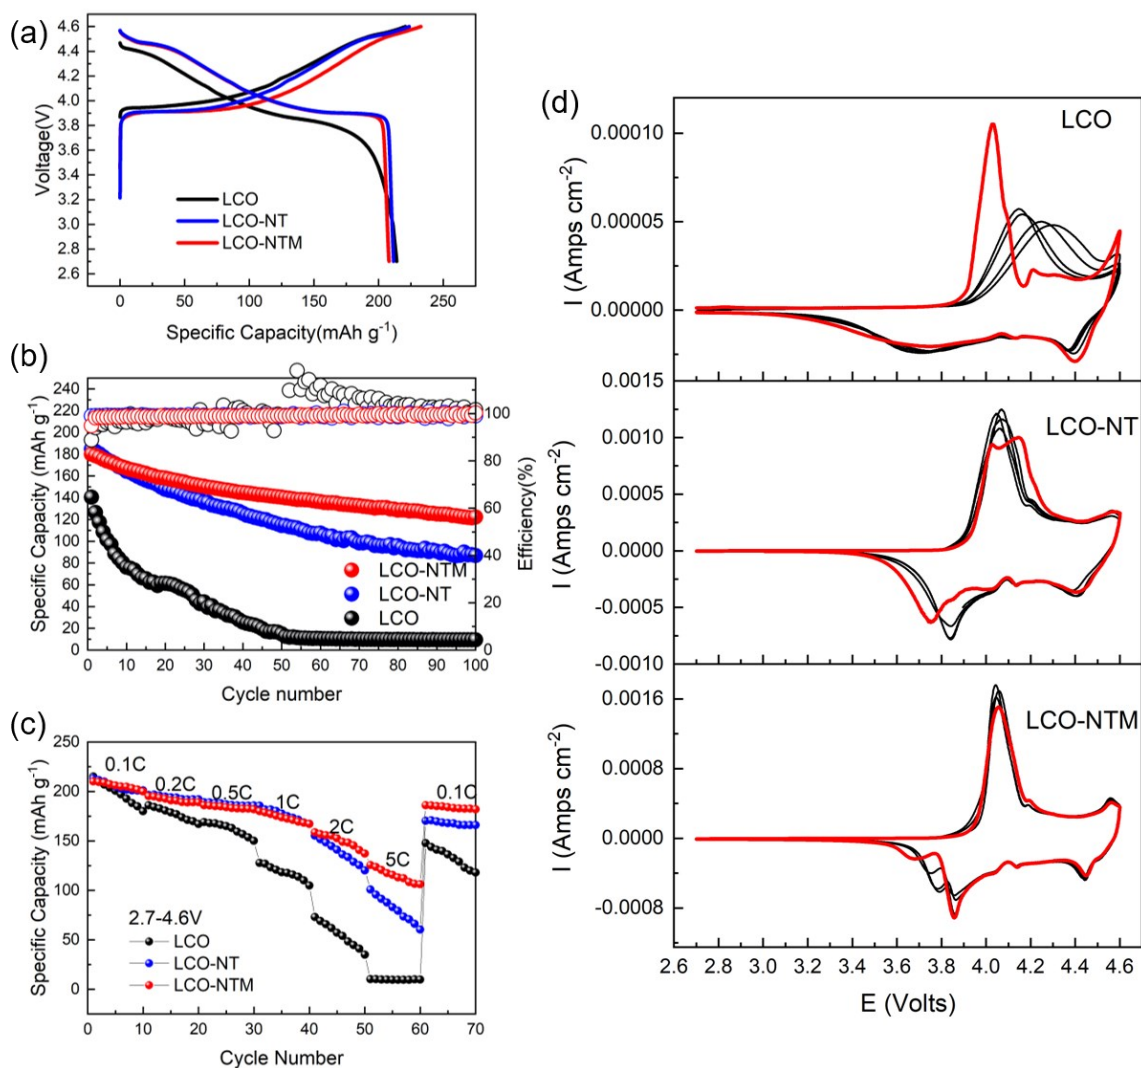

Figure S2. Electrochemical characterization of LCO and co-doped LCO in the voltage range of 2.7–4.6 V. (a) The first charge–discharge voltage profiles at 0.1 C. (b) The cycling performance at 1 C. (c) Rate performance. (d) The CV curves of LCO, LCO-NT and LCO-NTM in the initial five cycles.

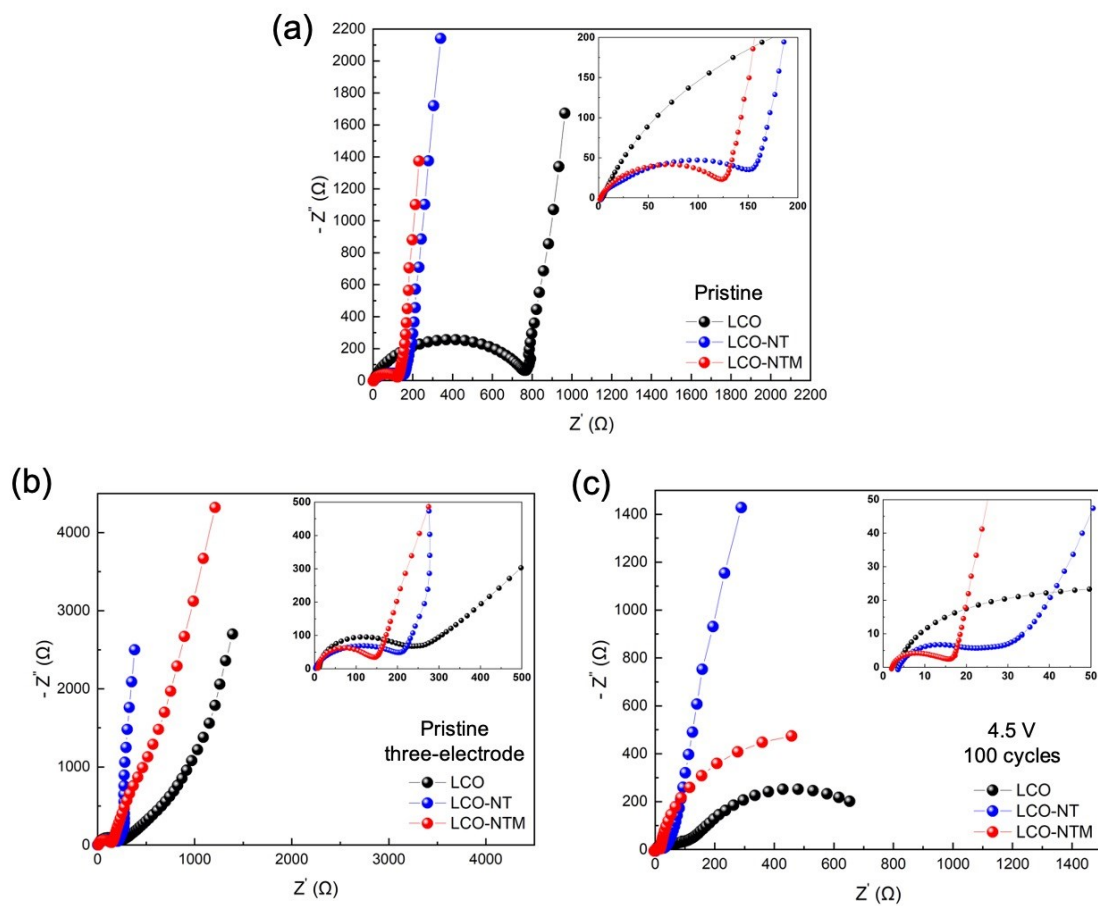

Figure S3. Electrochemical impedance spectra for LCO, LCO-NT and LCO-NTM cathodes, respectively, before cycling using coin-cell setup (a), before cycling using three-electrode setup (b), and after 100 cycles using coin-cell setup (c). In the three-electrode setup, Pt electrode and Ag/AgCl electrode were used as the work electrode and the reference electrode, respectively.

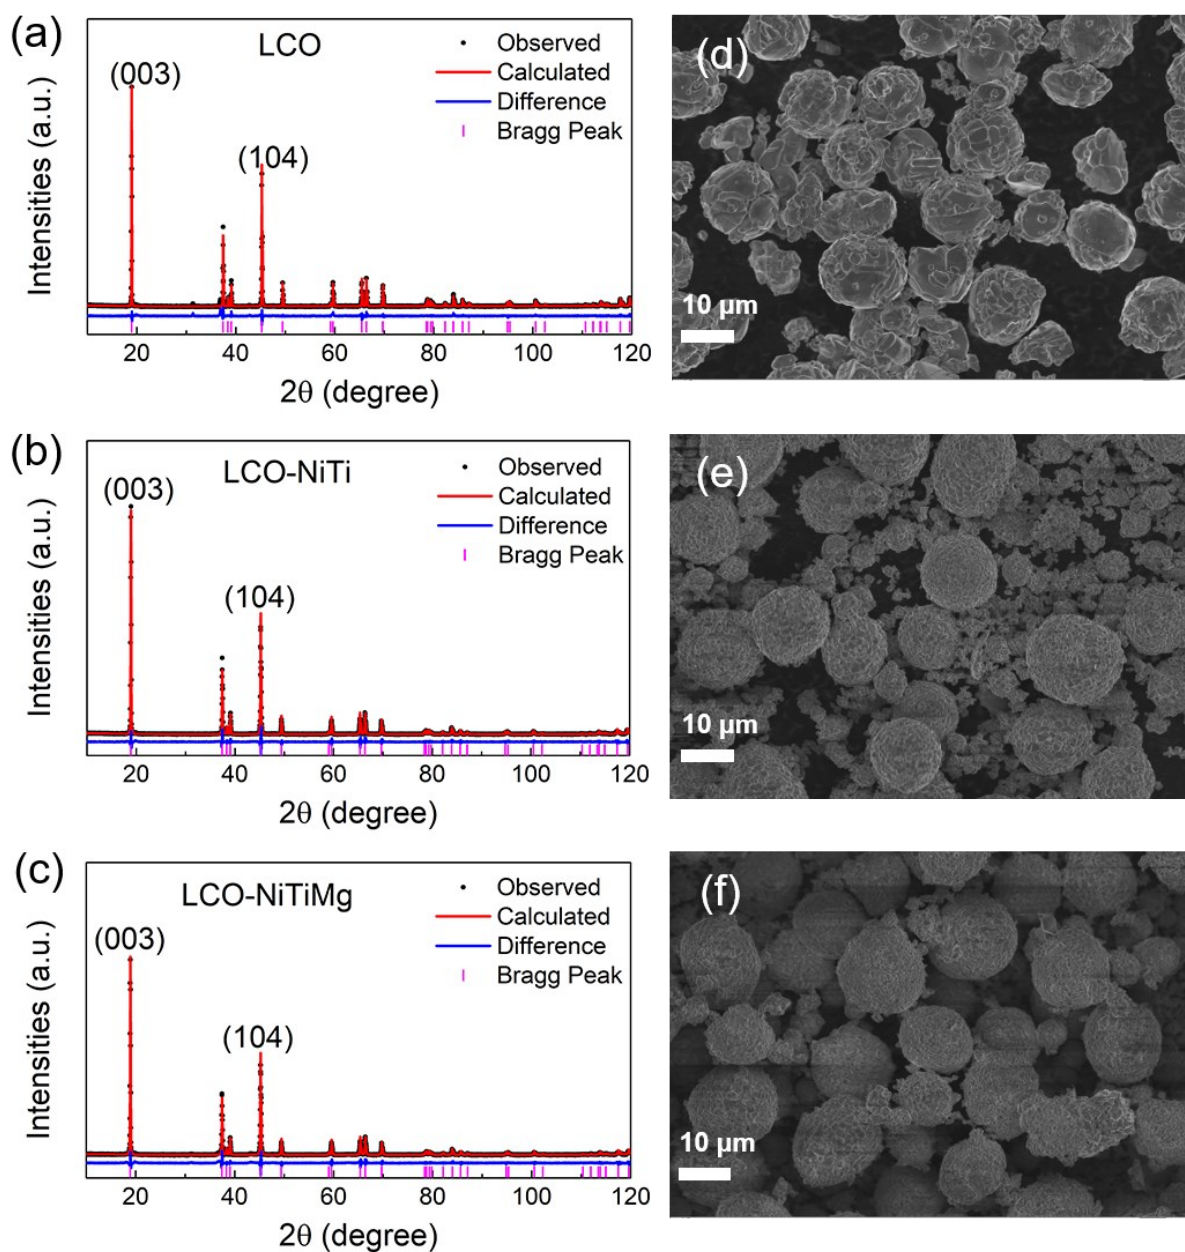

Figure S4. XRD patterns and Rietveld refinements of LCO (a), LCO-NT (b) and LCO-NTM (c). scanning electron microscope (SEM) images of LCO(d), LCO-NT (e) and LCO-NTM (f).



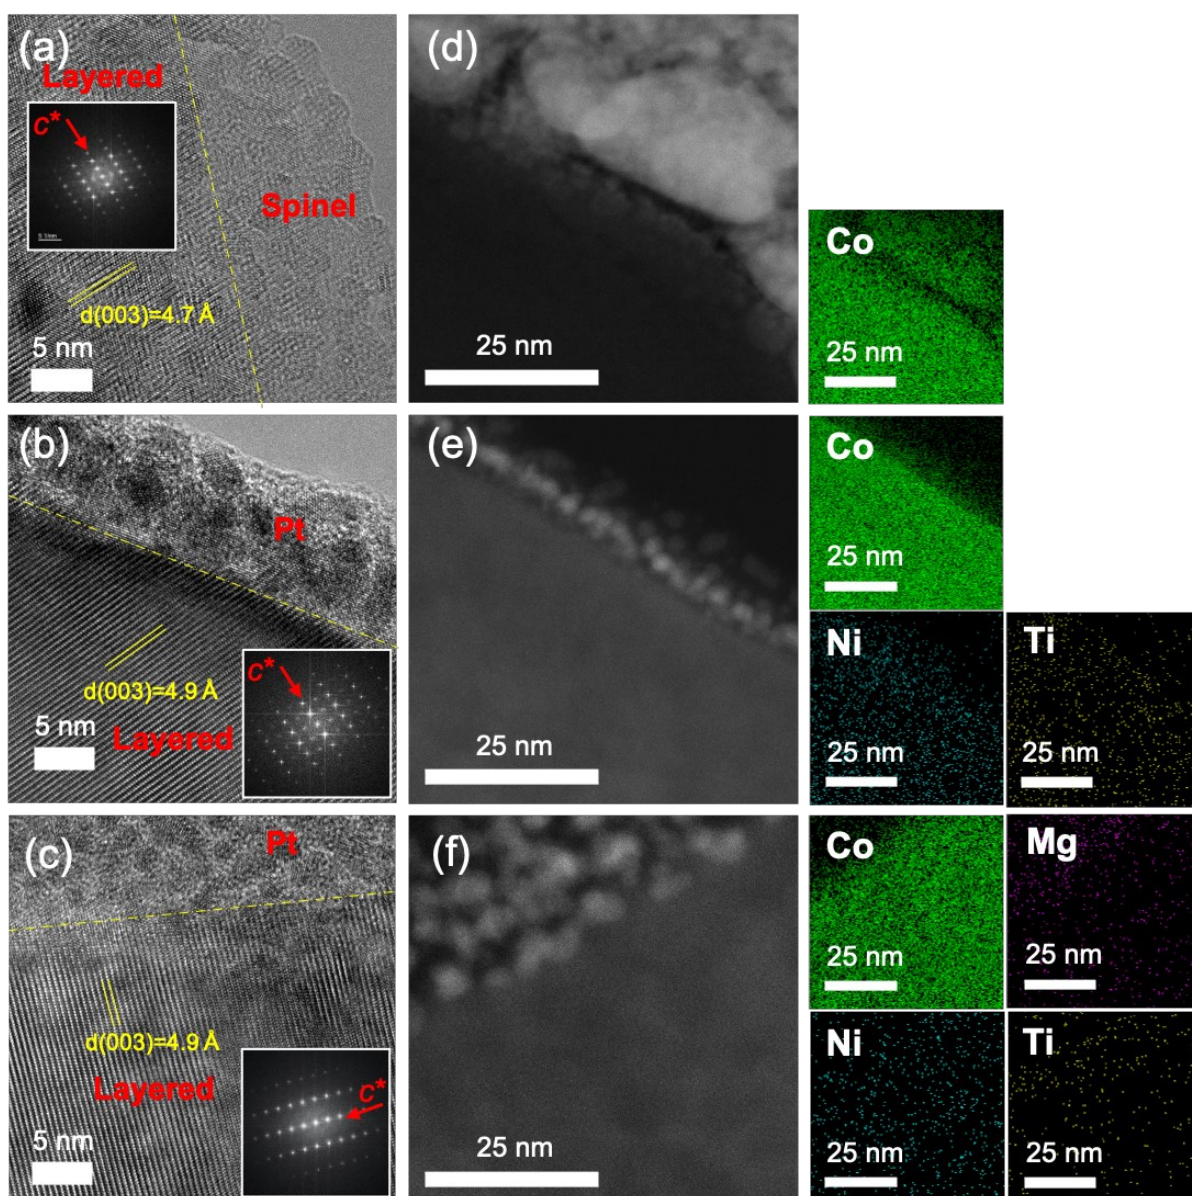

Figure S5. HRTEM images at the particle surface of LCO (a), LCO-NT (b) and LCO-NTM (c). The corresponding TEM-EDX mapping of LCO (d), LCO-NT (e) and LCO-NTM (f).

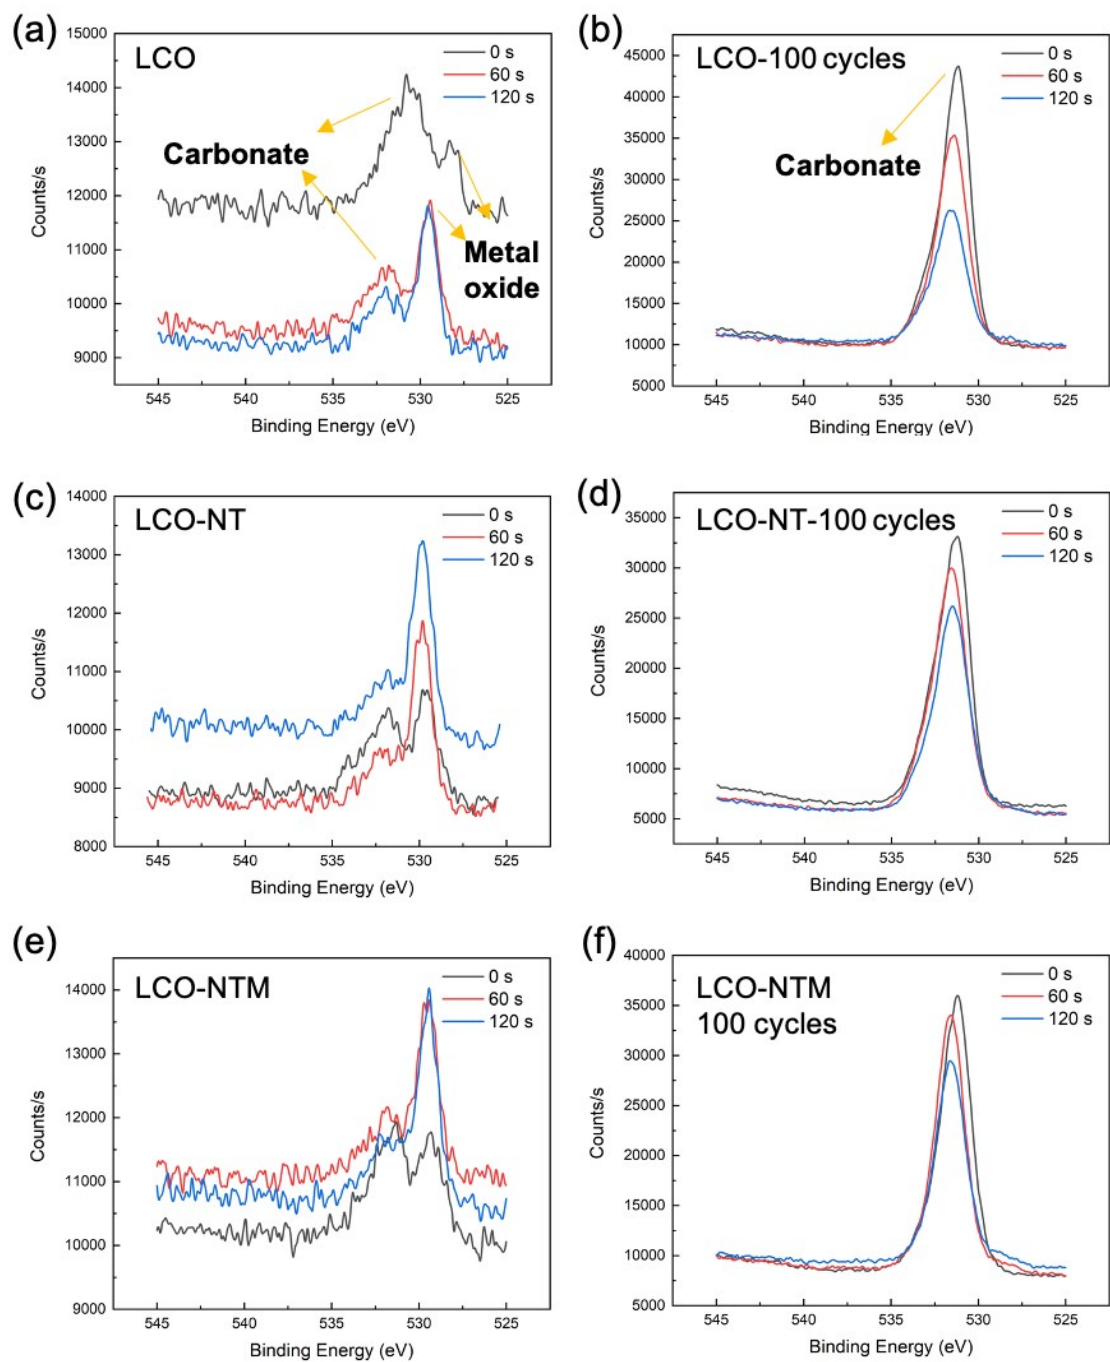

Figure S6. O 1s spectra of LCO (a, b), LCO-NT (c, d), and LCO-NTM (e, f) before cycling and after 100 cycles.

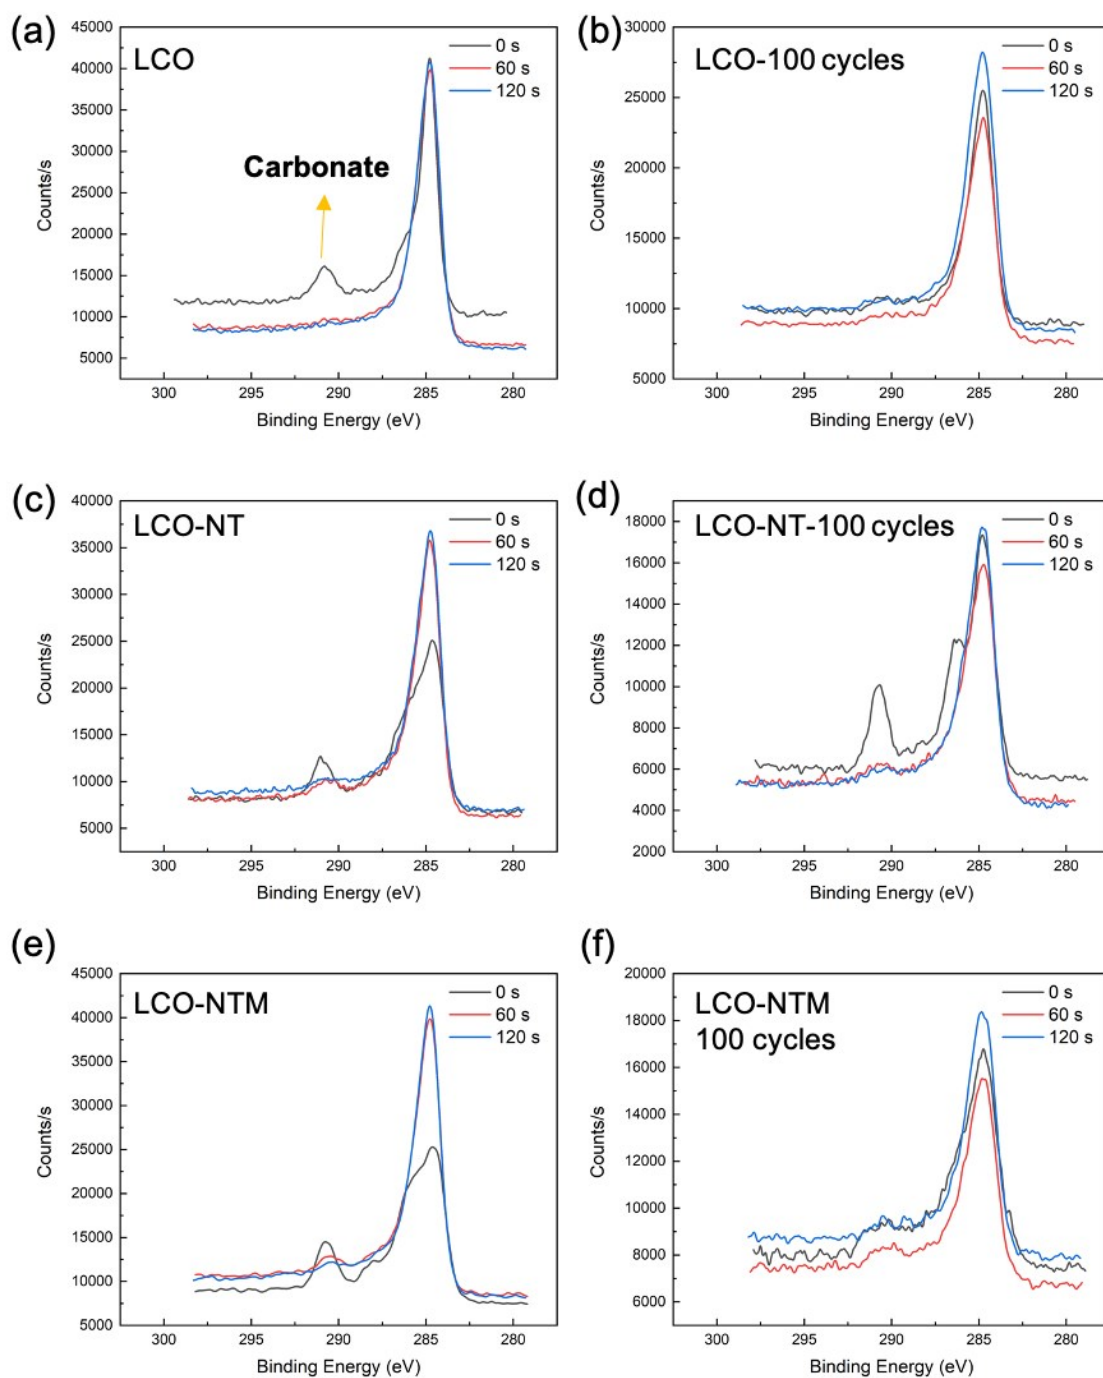

Figure S7. C 1s spectra of LCO (a, b), LCO-NT (c, d), and LCO-NTM (e, f) before cycling and after 100 cycles.



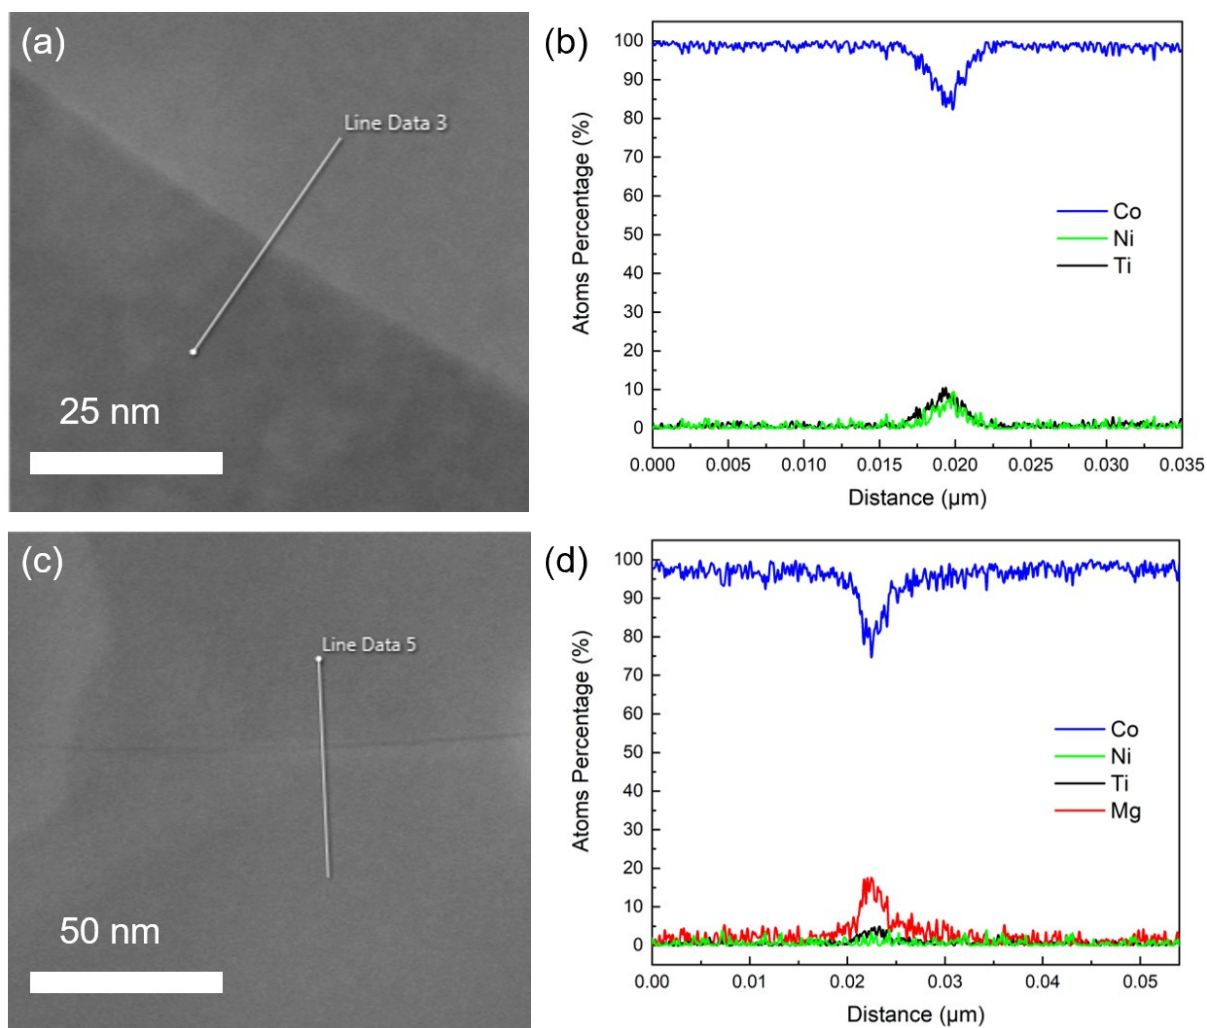

Figure S8. TEM images of the grain boundaries for LCO-NT (a) and LCO-NTM (c). EDX line scanning of LCO-NT (b) and LCO-NTM (d) perpendicular to the grain boundary in the corresponding TEM images (labelled by the white lines). The total content of all metal elements is normalized to 100%.

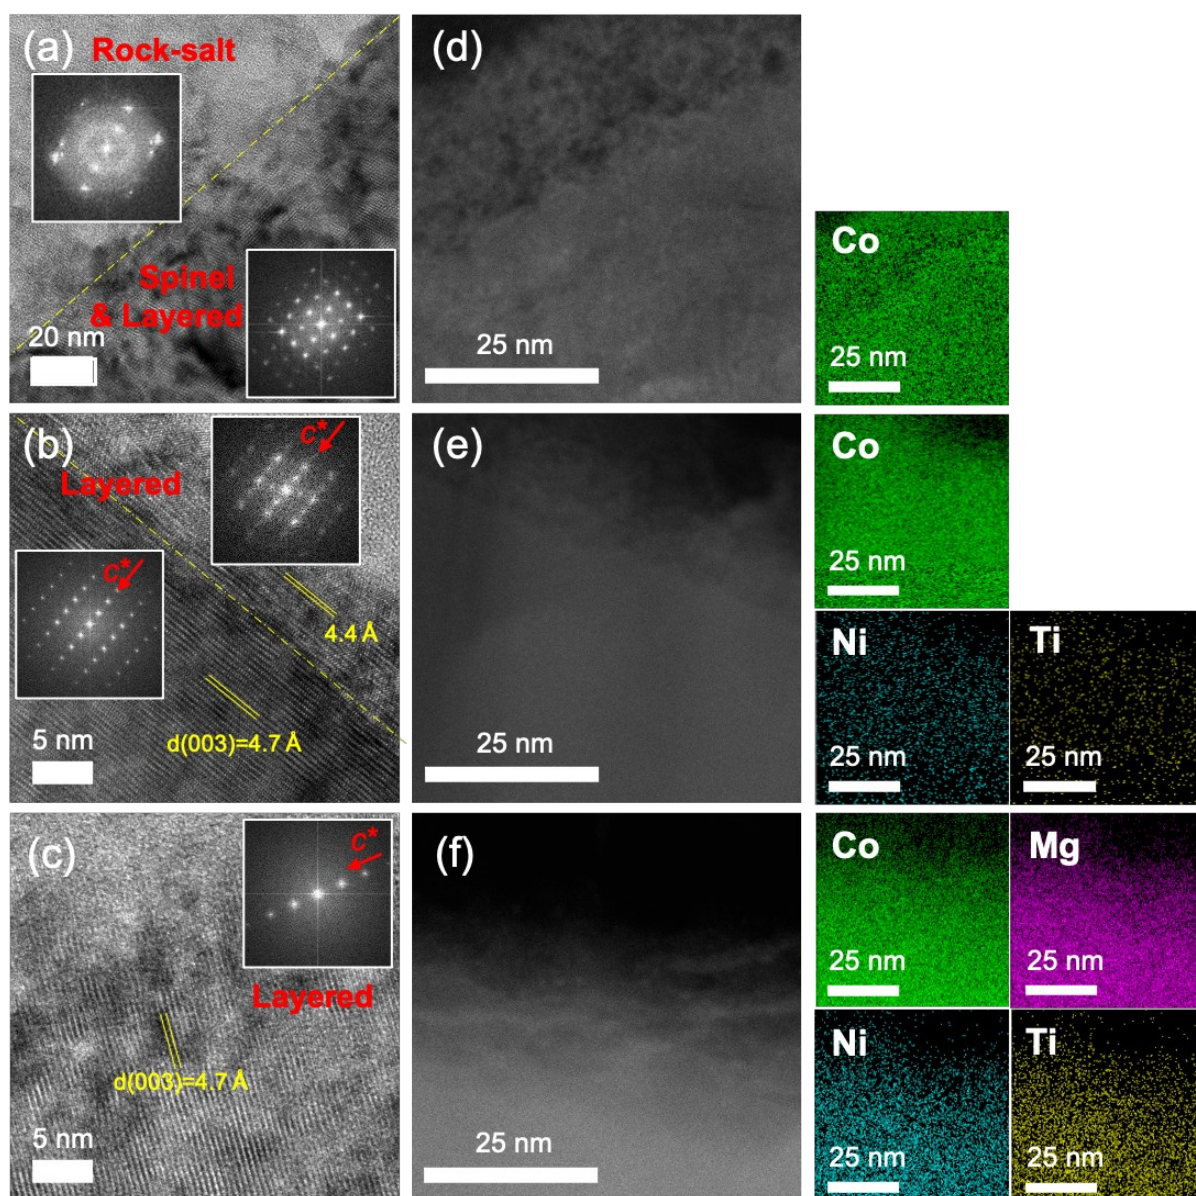

Figure S9. HRTEM images at the particle surface of LCO (a), LCO-NT (b) and LCO-NTM (c) after 100 cycles at 4.5 V. The corresponding TEM-EDX mapping of LCO (d), LCO-NT (e) and LCO-NTM (f) after 100 cycles at 4.5 V.

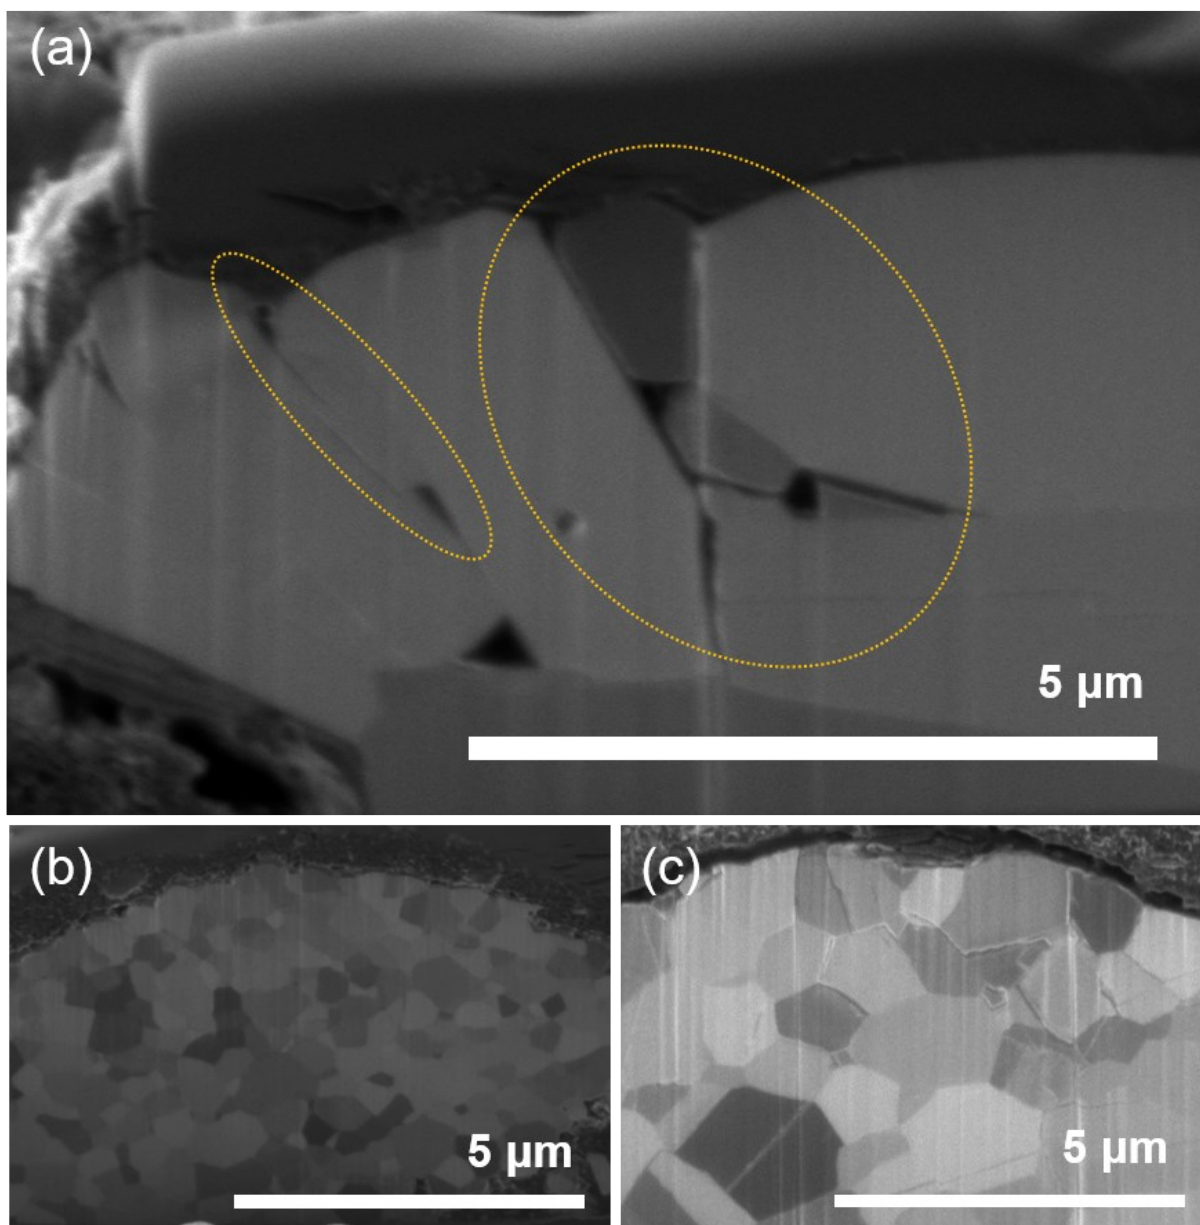

Figure S10. Ion-induced secondary electron (ISE) images of the cross sections for LCO (a), LCO-NT (b) and LCO-NTM (c) after 100 cycles at 4.5 V. The cross-section samples were prepared by FIB.



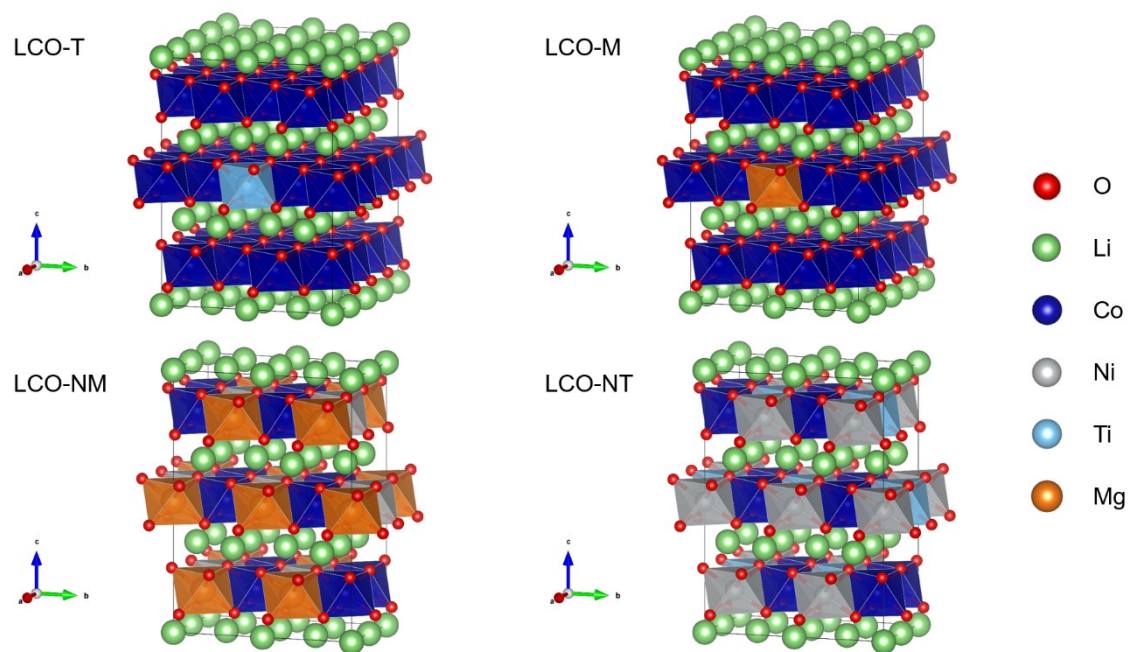

Figure S11. Structure models of Ti doped LCO (LCO-T), Mg doped LCO (LCO-M), Ni/Mg co-doped LCO (LCO-NM) and Ni/Ti co-doped LCO (LCO-NT) for DFT calculations.

## 2. Tables

Table S1. The elemental compositions determined by ICP-AES. The sum of Co, Ni, Ti, Mg was normalized to 1.0. The Li content was normalized accordingly.

| Sample  | molar ratio |        |        |        |        |
|---------|-------------|--------|--------|--------|--------|
|         | Li          | Co     | Mg     | Ni     | Ti     |
| LCO     | 1.0504      | 1.000  | -      | -      | -      |
| LCO-NT  | 1.0609      | 0.9830 | -      | 0.0071 | 0.0099 |
| LCO-NTM | 1.0615      | 0.9688 | 0.0111 | 0.0097 | 0.0102 |



Table S2. Refinement parameters for XRD patterns of LCO, LCO-NT and LCO-NTM.

| Samples               | LCO          | LCO-NT       | LCO-NTM      |
|-----------------------|--------------|--------------|--------------|
| Space group           | $R\bar{3}m$  | $R\bar{3}m$  | $R\bar{3}m$  |
| $R_{wp}$              | 4.02         | 4.92         | 4.59         |
| $R_p$                 | 2.48         | 3.04         | 3.05         |
| $a$ (Å)               | 2.815194(17) | 2.814625(28) | 2.814282(33) |
| $c$ (Å)               | 14.05060(14) | 14.07512(24) | 14.07566(28) |
| $V$ (Å <sup>3</sup> ) | 96.4366(15)  | 96.5659(25)  | 96.5461(30)  |
| grain size (nm)       | 457(10)      | 247.2(39)    | 217.5(35)    |
| $z(O)$                | 0.24153(18)  | 0.24154(17)  | 0.24141(18)  |
| Li-slab (Å)           | 2.5798(19)   | 2.5840(34)   | 2.5878(36)   |
| TM-slab (Å)           | 2.1038(28)   | 2.1077(27)   | 2.1041(30)   |

Table S3. The BET surface areas for three samples.

| Samples | BET surface area (m <sup>2</sup> g <sup>-1</sup> ) |
|---------|----------------------------------------------------|
| LCO     | 0.5113                                             |
| LCO-NT  | 0.0113                                             |
| LCO-NTM | 0.0291                                             |

Table S4. The calculated total energies ( $E_{total}$ ), formation energies ( $E_f$ ) and the lattice parameter  $c$  of eight structure models in Figure 6a and S10.

| Compounds | Structural models                                                      | $E_{total}$ (eV) | $E_f$ (eV/atom) | $c$ (Å) |
|-----------|------------------------------------------------------------------------|------------------|-----------------|---------|
| LCO       | $\text{Li}_{48}\text{Co}_{48}\text{O}_{96}$                            | -227295.378      | -2.9919         | 13.077  |
| LCO-N     | $\text{Li}_{48}\text{Co}_{47}\text{NiO}_{96}$                          | -227798.420      | -2.9867         | 13.083  |
| LCO-T     | $\text{Li}_{48}\text{Co}_{47}\text{TiO}_{96}$                          | -225175.048      | -2.9340         | 13.100  |
| LCO-M     | $\text{Li}_{48}\text{Co}_{47}\text{MgO}_{96}$                          | -225095.915      | -3.0164         | 13.081  |
| LCO-NT    | $\text{Li}_{24}\text{Co}_{12}\text{Ni}_6\text{Ti}_6\text{O}_{48}$      | -104032.479      | -3.1579         | 13.433  |
| LCO-TM    | $\text{Li}_{24}\text{Co}_{12}\text{Mg}_6\text{Ti}_6\text{O}_{48}$      | -87822.279       | -3.5651         | 13.588  |
| LCO-NM    | $\text{Li}_{24}\text{Co}_{12}\text{Ni}_6\text{Mg}_6\text{O}_{48}$      | -103474.161      | -3.2766         | 13.315  |
| LCO-NTM   | $\text{Li}_{24}\text{Co}_6\text{Ni}_6\text{Mg}_6\text{Ti}_6\text{O}_4$ | -90839.312       | -3.4903         | 13.468  |

8

Notes. The atomic energies for Li, Co, O, Ni, Ti and Mg are -190.9905, -3676.6141, -427.8742, -4180.6497, -1567.3877, -1472.4343 eV, respectively.

Table S5. The formation energies ( $E_f$ ) of four systems: (1) the coexistence of LCO and LCO-NTM; (2) the coexistence of LCO-N and LCO-TM; (3) the coexistence of LCO-T and LCO-NM; (4) the coexistence of LCO-M and LCO-NT.

| Four cases       | $E_f$ (eV/atom) |
|------------------|-----------------|
| 6 LCO + LCO-NMT  | -3.0302         |
| 6 LCO-N + LCO-TM | -3.0312         |
| 6 LCO-T + LCO-NM | -2.9604         |
| 6 LCO-M + LCO-NT | -3.0273         |
